# Supplementary material
Source: PubMed Central journal article supplement (PMC4005984)

# Supplementary Figure 1

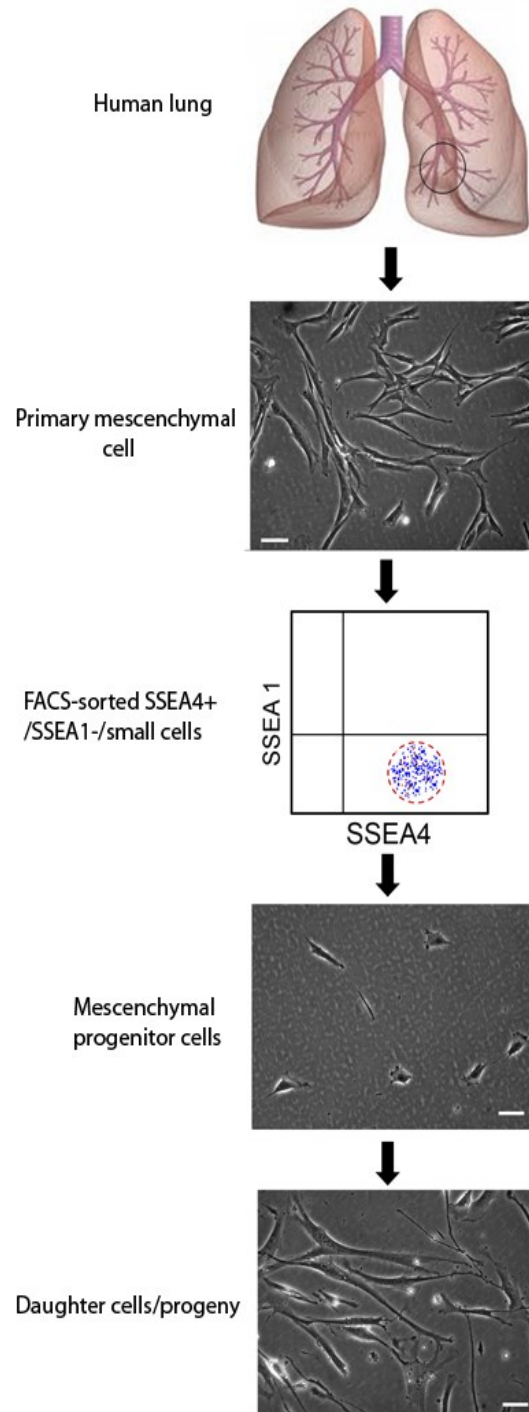

Supplement: mmc1.pdf [file mmc1.pdf]

## Supplementary Figure 10

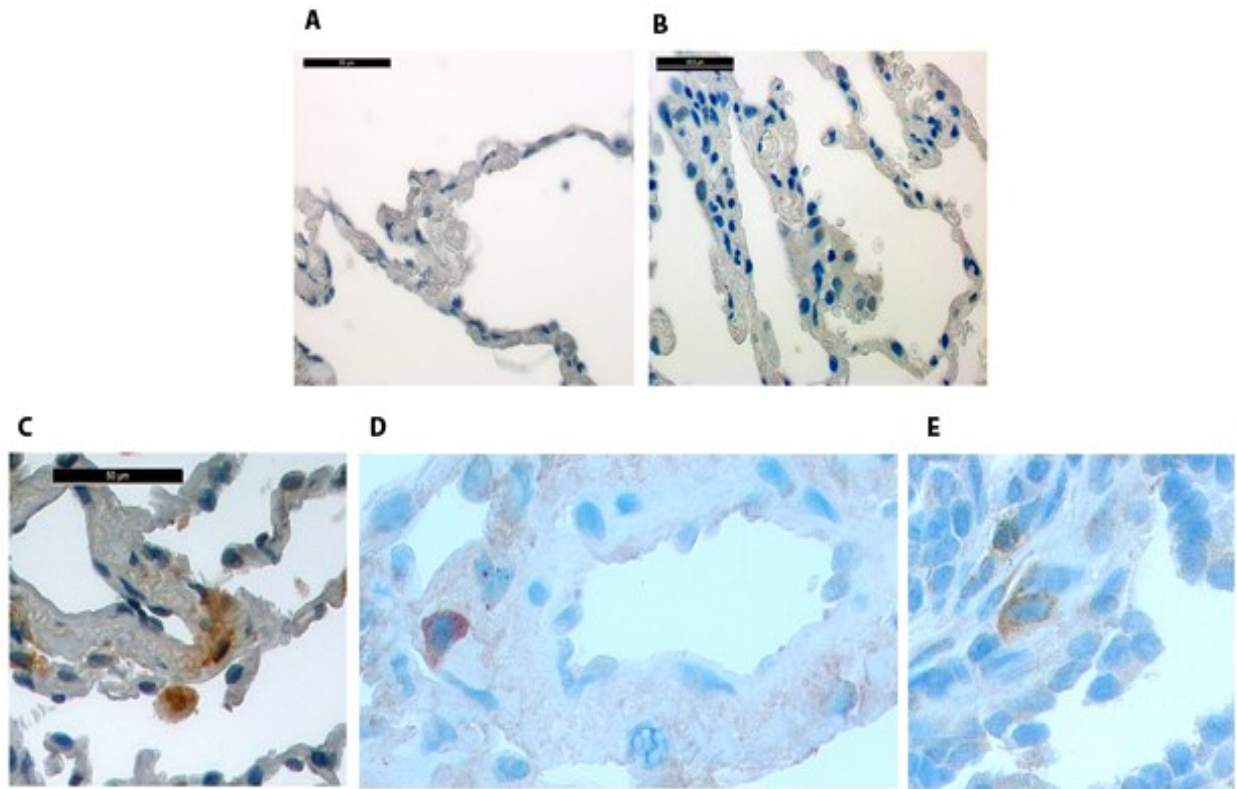

Supplement: mmc10.pdf [file mmc10.pdf]

Supplementary Figure 11

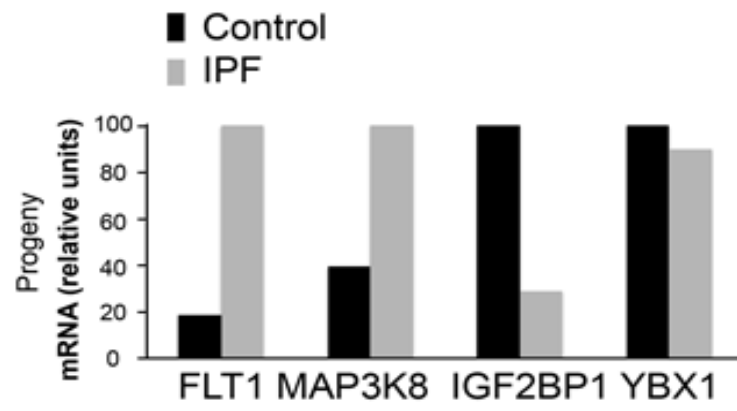

Supplement: mmc11.pdf [file mmc11.pdf]

## Supplementary Figure 2

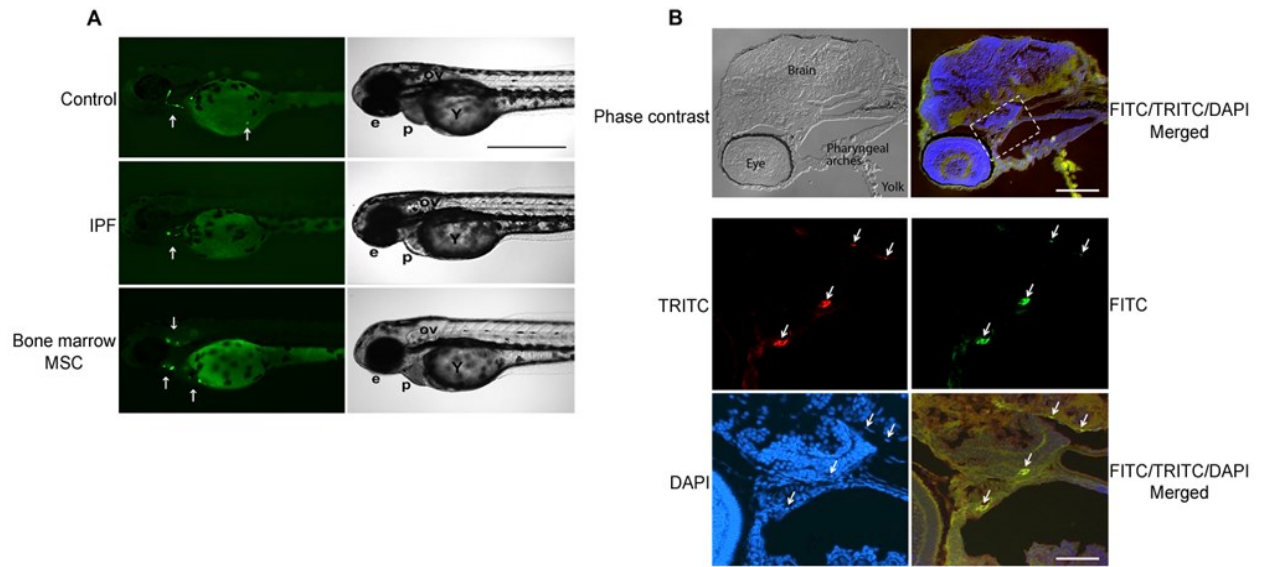

Supplement: mmc2.pdf [file mmc2.pdf]

### Supplementary Figure 3

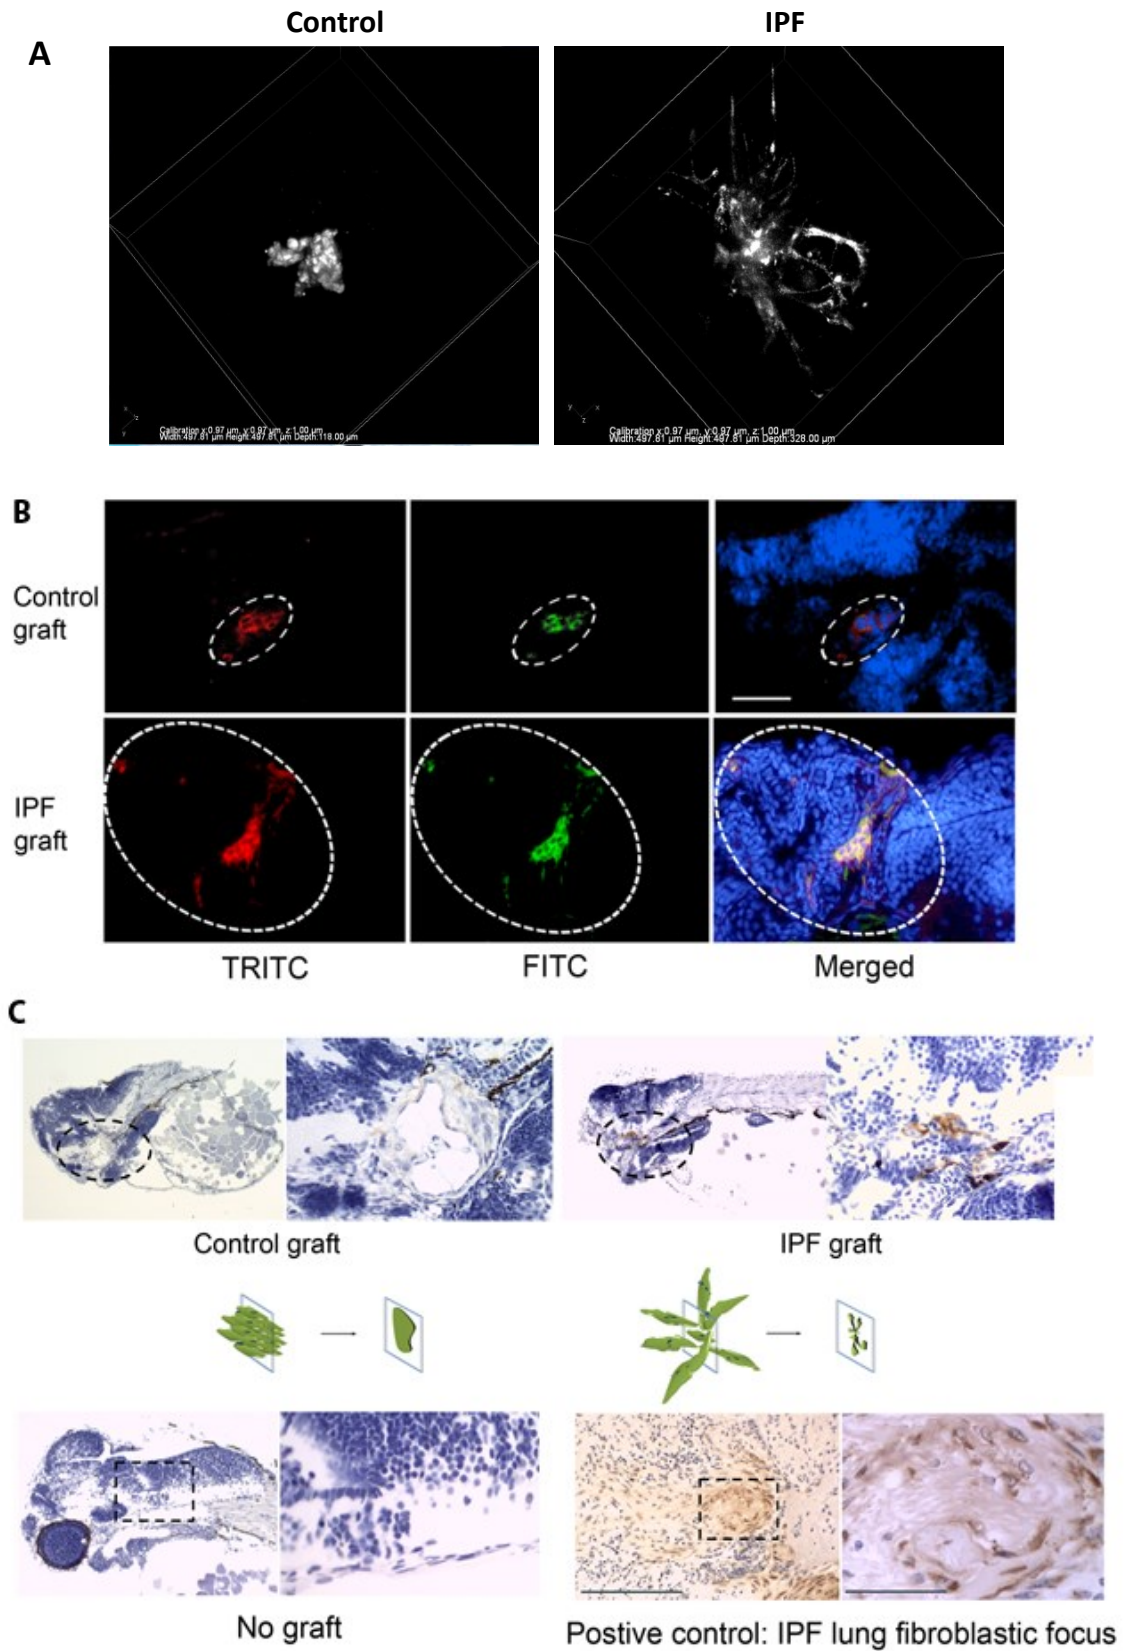

Supplement: mmc3.pdf [file mmc3.pdf]

**Supplementary Figure 4**

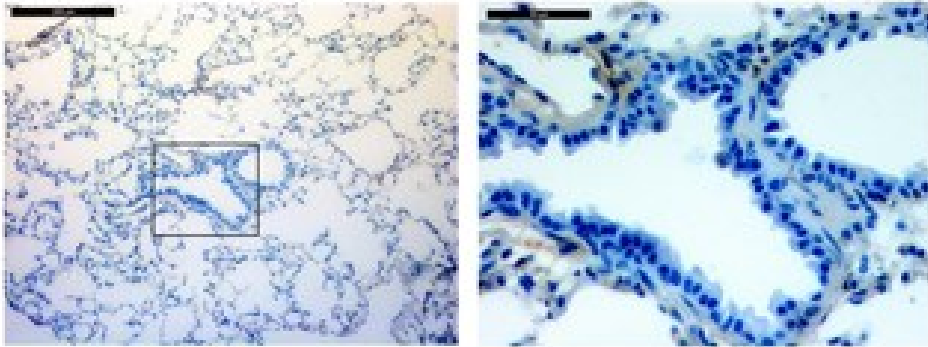

Supplement: mmc4.pdf [file mmc4.pdf]

### Supplementary Figure 5

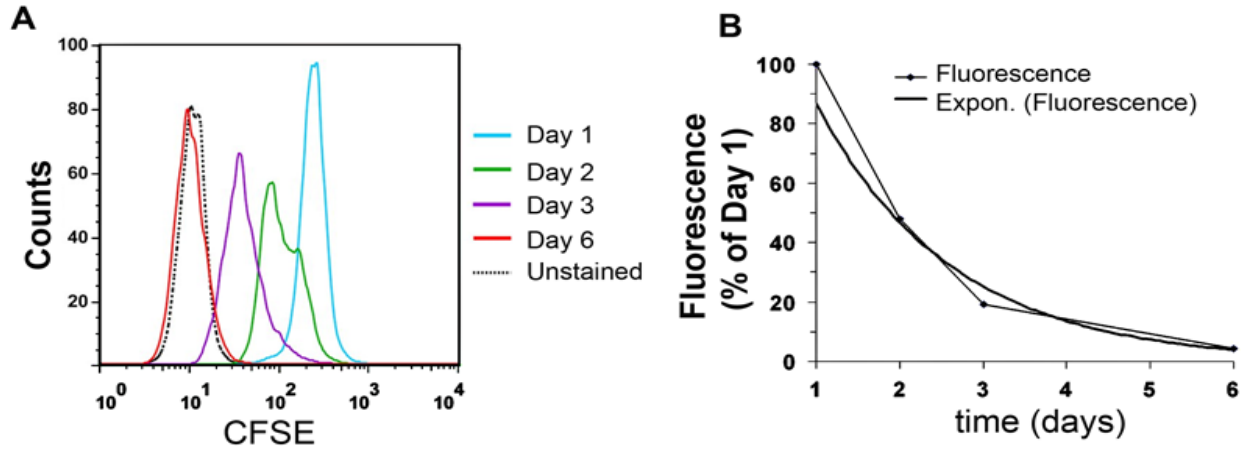

Supplement: mmc5.pdf [file mmc5.pdf]

## Supplementary Figure 6

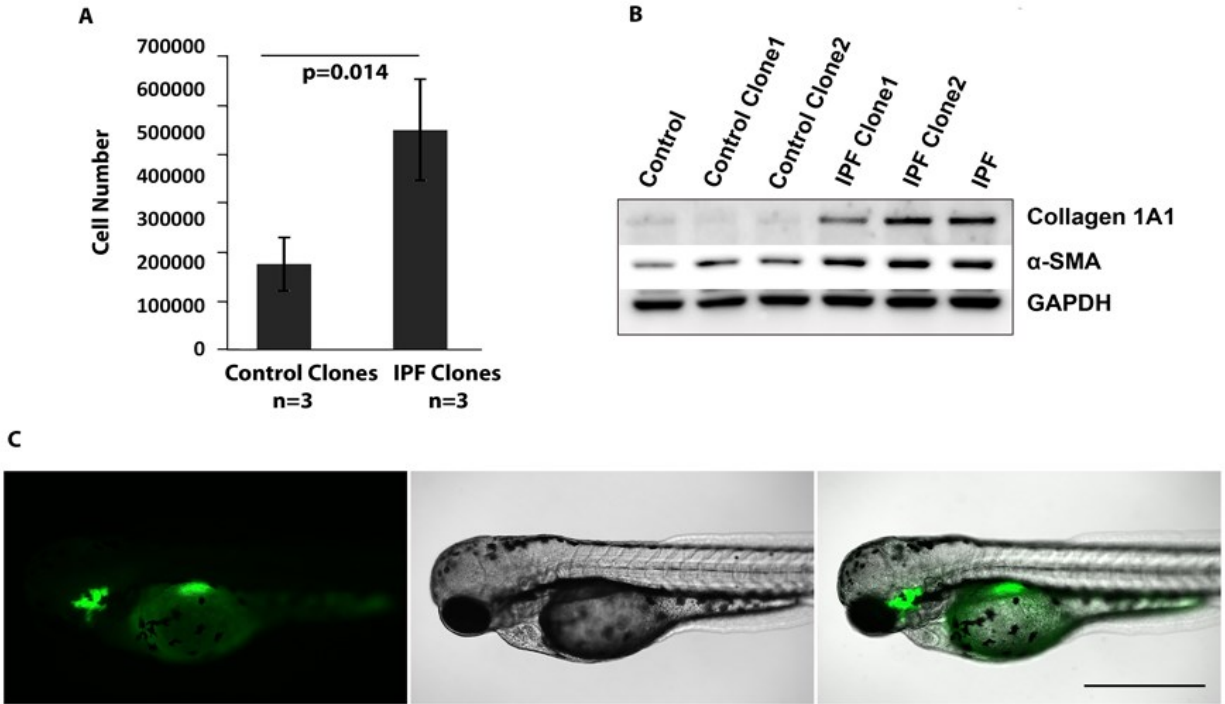

Supplement: mmc6.pdf [file mmc6.pdf]

**Supplementary Figure 7**

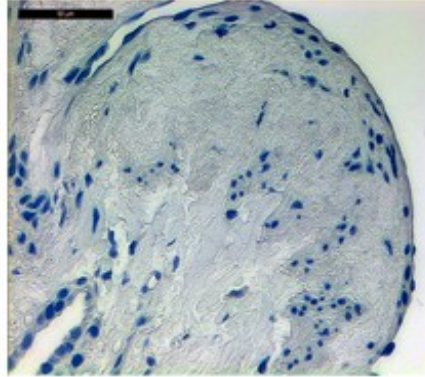

Supplement: mmc7.pdf [file mmc7.pdf]

## Supplementary Figure 8

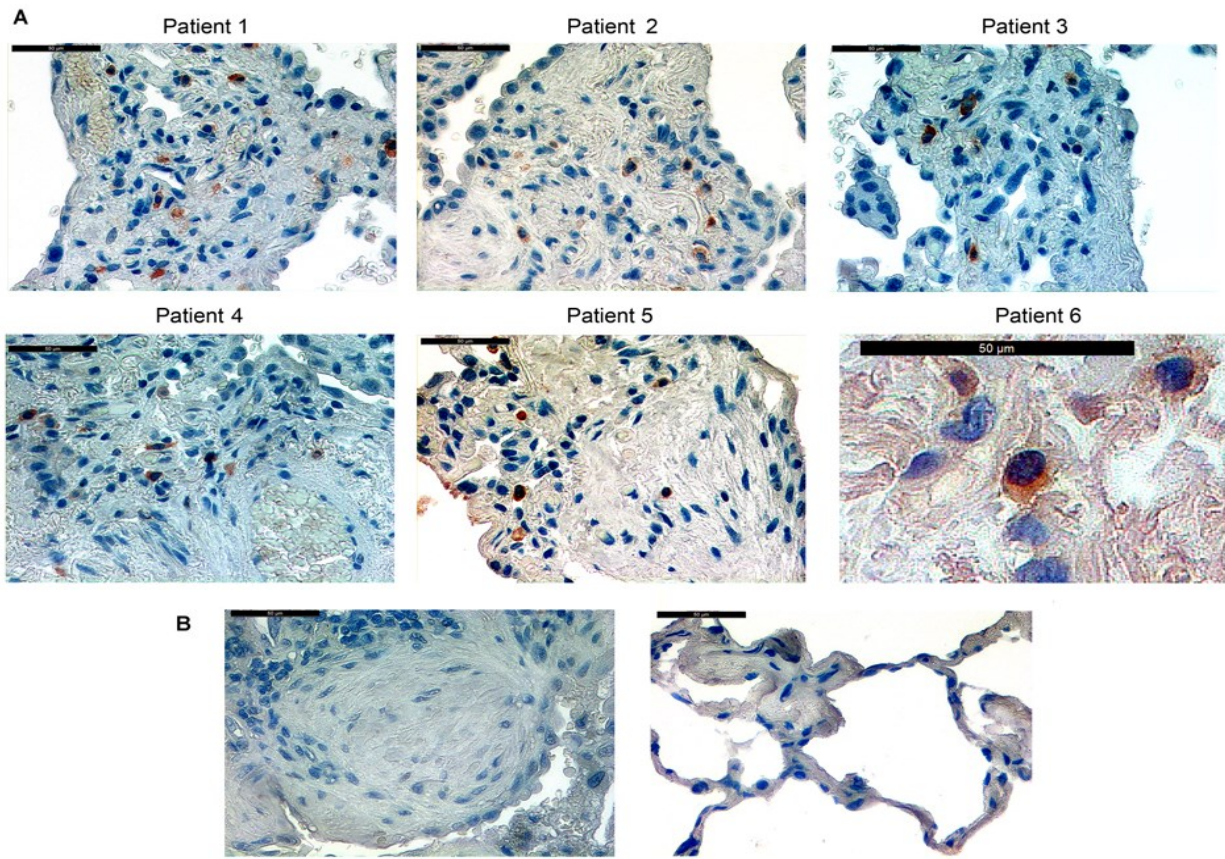

Supplement: mmc8.pdf [file mmc8.pdf]

## Supplementary Figure 9

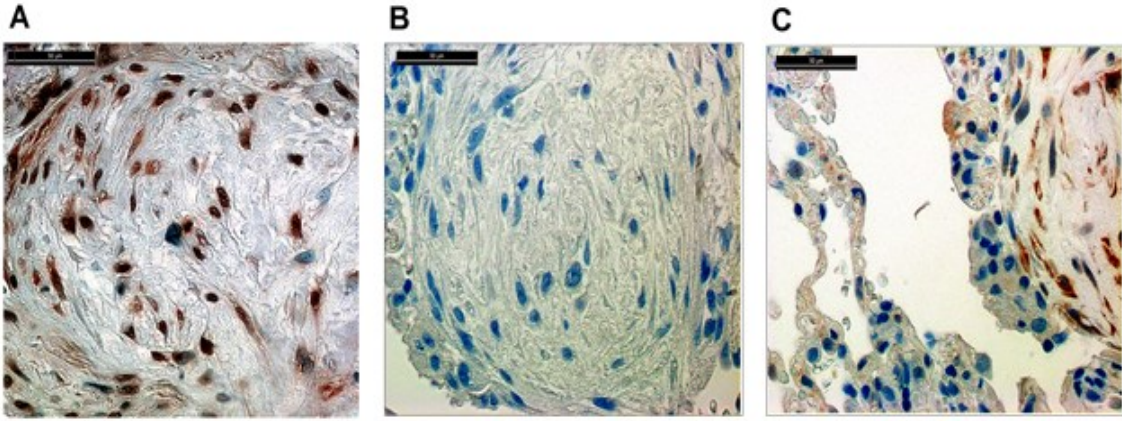

Supplement: mmc9.pdf [file mmc9.pdf]
